# Supplementary material for: Paleotsunami History of Hachinohe, Northern Japan: A Multiproxy Analysis and Numerical Modeling Approach
Source: Research Square preprint supplement (doi:10.21203/rs.3.rs-970814/v1), 2021-10-25
Supplement: Supplementary file 1 [file 2afdf7af93cf9f122d90f12f.xlsx]

## Sheet: Lithology
Table 1. General sedimentological characteristics of the sand layers found in the five main cores. Note that there is not a lateral correlation among the core samples. Neither the thickness of the cells represents the thickness of the sand layers. Colors enhance the stratigraphic position of tephra (gray), sand (yellow), and peaty mud or soil (white) layers.
Core Ha8					Core H02					Core H03					Core H04					Core H06
Lithology	Grain Size	General description	Color		Lithology	Grain Size	General description	Color		Lithology	Grain Size	General description	Color		Lithology	Grain Size	General description	Color		Lithology	Grain Size	General description	Color
Soil	Mud	Paddy field related soil	Black		Soil	Mud	Paddy field related soil	Black		Soil	Mud	Paddy field related soil	Black		Soil	Mud	Paddy field related soil	Black		Soil	Mud	Paddy field related soil	Black
Tephra 1	Lapilli	Upward fining	Khaki		Tephra 1	Lapilli	Upward fining	Khaki		Tephra 1	Lapilli	Upward fining.	Khaki		Tephra 1	Lapilli to ash	Upward fining	Khaki		Tephra 1	Lapilli	Upward fining	Gray
Mud	Mud	Peaty mud	Black		Mud	Mud	Peaty mud	Black		Mud	Mud	Peaty mud	Black		Mud	Mud	Peaty mud	Black		Silt	Silt	Peaty mud	Gray-dark
Tephra 2	Lapilli	Massive tephra	Khaki		Tephra 2	Lapilli	Massive tephra	Khaki		Tephra 2	Ash	Massive tephra	Khaki		Tephra 2	Lapilli	Massive tephra	Khaki		Tephra 2	Lapilli	Massive tephra	Khaki
Mud	Mud	Peaty mud	Black		Mud	Mud	Peaty mud	Black		Mud	Mud	Peaty mud	Black		Mud	Mud	Peaty mud	Black		Mud	Mud	Peaty mud	Black
Tephra 3	Lapilli to ash	Thiny clay layers at the base with interlayered mud	Gray-White		Tephra 3	Lapilli to ash	Thiny clay layers at the base with interlayered mud	Gray-White		Tephra 3	Lapilli	Massive tephra	Gray-White		Tephra 3	Lapilli	Thiny clay layers at the base with interlayered mud	Gray-White		Sand	vfSand	Massive sand, highly bioturbated	Dark brown
Mud	Mud	Peaty mud	Black		Mud	Mud	Peaty mud	Black		Mud	Mud	Peaty mud	Black		Mud	Mud	Peaty mud	Black		Mud	Mud	Peaty mud	Black
Sand	vfSand	Very thin bed of massive sand	Brown		Sand	vfSand	Very thin bed of massive sand	Brown		Sand	vfSand	Massive sand	Brown		Sand	vfSand	Massive sand, with bottom erosive contact	Brown		Sand	vfSand	Massive sand, highly bioturbated	Dark brown
Mud	Mud	Peaty mud	Black		Mud	Mud	Peaty mud	Black		Mud	Mud	Peaty mud	Black		Mud	Mud	Peaty mud	Black		Mud	Mud	Peaty mud	Black
Sand	vfSand	Very thin bed of massive sand	Brown		Sand	vfSand	Very thin bed of massive sand	Brown		Sand	mSand to fSand	Upward fining. Bottom erosive contact	Brown		Tephra 4	Ash	Clay	Gray-White		Tephra 3/4/5/6 ?	Lapilli to ash	Upward fining	Gray
Mud	Mud	Peaty mud	Black		Mud	Mud	Peaty mud	Black		Mud	Mud	Peaty mud	Black		Mud	Mud	Peaty mud	Black
Sand	fSand	Thin lamina of massive sand	Brown		Sand	fSand	Thin lamina of massive sand	Brown		Tephra 4	Ash	Clay	white		Sand	vfSand	Lens of sand	Brown
Mud	Mud	Peaty mud	Black		Mud	Mud	Peaty mud	Black		Mud	Mud	Peaty mud	Black		Mud	Mud	Peaty mud	black
Sand	vfSand	Massive sand	Dark brown		Sand	vfSand	Massive sand	Dark brown		Sand	Silt	Three main silt very thin beds intercalated with peaty mud. It is vissible lenticular stratification	Brown		Sand	vfSand	Flame structures at the base	Brown
Mud	Mud	Peaty mud	Black		Mud	Mud	Peaty mud	Black		Mud	Mud	Peaty mud	Black		Mud	Mud	Peaty mud	Black
Sand	m-fSand	Thin bed. Upward fining. Bottom erosive contact.	Light brown		Sand	m-fSand	Thin bed. Upward fining. Bottom erosive contact.	Light brown		Sand	mSand	Massive sand. Bottom erosive contact.	Orange		Sand	vfSand	Massive sand. Top and bottom transitional contacts.	Brown
Mud	Mud	Peaty mud	Black		Mud	Mud	Peaty mud	Black		Mud	Mud	Peaty mud	Black		Mud	Mud	Peaty mud	Black
Tephra 4	Ash	Clay	white		Tephra 4	Ash	Clay	white		Sand	fSand	Upward fining.	Dark brown		Sand	vfSand	Massive sand	Dark brown
Mud	Mud	Peaty mud	Black		Mud	Mud	Peaty mud	Black		Mud	Mud	Peaty mud	Black		Mud	Mud	Peaty mud	Black
Sand	Silt	Lenticular stratification	Brown		Sand	Silt	Lenticular stratification	Brown		Sand	fSand	Two thin sand laminas interbeded with peaty mud. Bottom erosive contact	Dark brown		Tephra 5/ 6?	Lapilli to ash	Thick tephra layer. Ash lamina at the base, then upward fining lapilli to ash.	Gray
Mud	Mud	Peaty mud	Black		Mud	Mud	Peaty mud	Black		Mud	Mud	Peaty mud	Black
Sand	vfSand to mSand	Thin bed. Upward coarsening. Bottom transitional contact	Brown		Sand	vfSand to mSand	Thin bed. Upward coarsening. Bottom transitional contact	Brown		Sand	fSand	Massive sand. Top and bottom transitional contacts.	Dark brown
Mud	Mud	Peaty mud	Black		Mud	Mud	Peaty mud	Black		Mud	Mud	Peaty mud	Black
Sand	Bottom subunit: vsSand to mSand Upper subunit: mSand to fSand	Thin bed divided in two subunits: the basal one (S8a) is a dark brown very fine upward coarsening to medium sand, the upper unit (S8b) is light brown upward fining. Bottom erosive contact.	Brown		Sand	Bottom subunit: vsSand to mSand Upper subunit: mSand to fSand	Thin bed divided in two subunits: the basal one (S8a) is a dark brown very fine upward coarsening to medium sand, the upper unit (S8b) is light brown upward fining. Bottom erosive contact.	Brown		Tephra 5/ 6?	Lapilli to ash	Thick tephra layer. Ash lamina at the base, then upward fining lapilli to ash.	Gray
Mud	Mud	Peaty mud	Black		Mud	Mud	Peaty mud	Black
Tephra5	Ash	Clay	Gray-White		Tephra5	Ash	Clay	Gray-White
Mud	Mud	Peaty mud	Black		Mud	Mud	Peaty mud	Black													Symbol	Description
Sand	vfSand	Two thin sand laminas interbeded with peaty mud including some intraclasts. Bottom erosive contact	Brown-dark		Sand	vfSand	Two thin sand laminas interbeded with peaty mud including some intraclasts. Bottom erosive contact	Brown-dark													vfSand	Very fine sand
Mud	Mud	Peaty mud	Black		Mud	Mud	Peaty mud	Black													fSand	Fine sand
Sand	fSand	Upward fining. Bottom erosive contact.	Light brown		Sand	fSand	Upward fining. Bottom erosive contact.	Light brown													mSand	Medium sand
Mud	Mud	Peaty mud	Black		Mud	Mud	Peaty mud	Black													cSand	Coarse sand
Tephra 6	Lapilli	Thick tephra layer. Ash lamina at the base, then upward fining lapilli to ash.	Gray		Tephra 6	Lapilli	Thick tephra layer. Ash lamina at the base, then upward fining lapilli to ash.	Gray													vcSand	Very coarse sand
